# Supplementary material
Source: publisher site journal article supplement (https://www.dovepress.com/article/489204)
Supplement: Supplementary file 1 [file get_supplementary_file.php]

**Supplementary Table 1** Binary logistic regression analysis for influencing factors of DPN in T2DM patients

|  | p |  | OR | 95% CL of OR | |
| --- | --- | --- | --- | --- | --- |
| FT3 | 0.022* |  | 0.542 | 0.321 | 0.916 |

**P*<0.05
